1 ***Arabidopsis* MADS-box transcription factor AGL21 acts as**  
2 **environmental surveillance for seed germination by regulating *ABI5***

3 Lin-Hui Yu<sup>1</sup>, Jie Wu<sup>1</sup>, Zi-Qing Miao<sup>1</sup>, Ping-Xia Zhao<sup>1</sup>, Zhen Wang<sup>1,2</sup>, and Cheng-Bin  
4 Xiang<sup>1\*</sup>

5 <sup>1</sup>School of Life Sciences, University of Science and Technology of China, Hefei,  
6 Anhui Province 230027, China

7 <sup>2</sup>Shanghai Center for Plant Stress Biology, Shanghai Institutes for Biological Sciences,  
8 Chinese Academy of Sciences, Shanghai 200032, China

9 \*Correspondence: xiangcb@ustc.edu.cn

10

11 **Running title:** AGL21 regulates seed germination

12

13

14

15

16

17

18

19

20

21

22

23

24

25

26

27

28

29

30 **ABSTRACT**

31 Seed germination is a crucial checkpoint for plant survival under unfavorable  
32 environmental conditions. Abscisic acid (ABA) and its signaling play a vital role in  
33 integrating environmental information to regulate seed germination.  
34 MCM1/AGAMOUS/DEFICIENS/SRF (MADS)-box transcription factors are mainly  
35 known as key regulators of seed and flower development in *Arabidopsis*. However,  
36 their functions in seed germination are still poorly understood. Here we report that  
37 MADS-box transcription factor AGL21 negatively modulates seed germination and  
38 post-germination growth by controlling the expression of *ABA-INSENSITIVE 5 (ABI5)*  
39 in *Arabidopsis*. *AGL21* responds to multiple environmental stresses and plant  
40 hormones. The *AGL21*-overexpressing plants are hypersensitive to ABA, salt and  
41 osmotic stresses during seed germination and early post-germination growth, whereas  
42 *agl21* mutants are less sensitive. AGL21 positively regulates *ABI5* expression in seeds.  
43 Genetic analyses reveal that *AGL21* is epistatic to *ABI5* in controlling seed  
44 germination. Chromatin immunoprecipitation assays further demonstrate that AGL21  
45 could directly bind to the *ABI5* promoter in plant cells. Taken together, our results  
46 suggest that AGL21 acts as a surveillance integrator that incorporates environmental  
47 cues and endogenous hormonal signals into ABA signaling to regulate seed  
48 germination and early post-germination growth.

49

50 **Key words:** MADS, AGL21, seed germination, ABA, ABI5

51

52

53

54

55

56

57

58

59

## 60 INTRODUCTION

61 Seed dormancy is a vital trait for plants to adapt to varieties of habitats and  
62 climates. Seed germination is arrested under adverse conditions and resumed when  
63 the conditions are favorable. Generally, seed germination commences with three  
64 phases of water uptake (Bewley, 1997), followed by embryo expansion and finished  
65 with radicle emergence. The optimal level of seed dormancy and germination has  
66 important repercussions on agricultural production. Therefore, it is essential to study  
67 the underlying molecular mechanisms that control seed dormancy and germination.

68 To sessile organisms, the ambient environment is vital for their survival. A variety  
69 of environmental factors, including nutrients, water availability, temperature, light,  
70 oxygen, and soil salinity, affect seed germination (Finkelstein et al., 2008; Holdsworth  
71 et al., 2008). Plants have evolved an array of strategies to constantly monitor the  
72 changing environmental conditions to decide when to germinate (Finkelstein et al.,  
73 2008). The environmental cues perceived by seeds can be incorporated into  
74 endogenous hormonal signaling pathways to regulate germination. Among various  
75 phytohormones, abscisic acid (ABA) and gibberellic acid (GA) are regarded as the  
76 primary regulators of transition from dormancy to germination (Seo et al., 2006; Shu  
77 et al., 2016). ABA is required for seed dormancy maintenance, while GA acts  
78 antagonistically to release dormancy and initiate seed germination (Shu et al., 2013).  
79 Environmental factors regulate the ABA:GA balance and the sensitivity to these  
80 hormones by modifying the biosynthetic and catabolic pathways, as well as signaling  
81 pathways, thus modulating seed dormancy and germination (Finch-Savage and  
82 Leubner-Metzger, 2006).

83 During germination, ABA content is decreased rapidly, and ABA signaling must  
84 be actively repressed. Through screening for ABA-insensitive (ABI) mutants, several  
85 ABA signaling components control seed germination have been identified in  
86 *Arabidopsis* (Finkelstein et al., 2002; Nambara and Marion-Poll, 2003). In contrast to  
87 ABI1/2, ABI3, ABI4 and ABI5 are key positive regulators of ABA signaling that  
88 modulate seed germination and post-germination development (Giraudat et al., 1992;  
89 Parcy et al., 1994; Finkelstein et al., 1998; Lopez-Molina et al., 2002). ABI5 is one of

90 the 13 members of the group-A bZIP TF subfamily, and can directly bind to the  
91 ABA-RESPONSE ELEMENT (ABRE) *cis*-element in the promoter sequence of  
92 ABA-responsive genes, such as *Arabidopsis EARLY METHIONINE-LABELED 1*  
93 (*AtEm1*), *AtEm6*, and *RD29B* to modulate their expression (Carles et al., 2002;  
94 Finkelstein et al., 2005; Nakashima et al., 2006). ABI5 interacts with ABI3 and acts  
95 downstream of ABI3 to execute an ABA-dependent growth arrest during germination  
96 (Lopez-Molina et al., 2002). ABI5 protein level and activity are tightly regulated  
97 post-transcriptionally. In stress conditions, ABA triggers phosphorylation and  
98 activation of ABI5 (Lopez-Molina et al., 2001; Dai et al., 2013), and KEEP ON  
99 GOING (KEG) E3 ligase is rapidly degraded (Stone et al., 2006), promoting the  
100 accumulation of high levels of ABI5. In favorable conditions, ABI5 is  
101 dephosphorylated by FyPP/PP6 (for Phytochrome-associated serine/threonine protein  
102 phosphatase/Ser/Thr-specific phosphoprotein phosphatase 6), and then the inactive  
103 ABI5 is degraded by the 26S proteasome (Dai et al., 2013). ABI5 can also be  
104 modified by S-nitrosylation and sumoylation, and is rapidly degraded, which is  
105 facilitated by ABI FIVE BINDING PROTEIN (AFP) and KEG (Miura et al., 2009;  
106 Albertos et al., 2015).

107 The MADS-box gene family in higher plant is a large family with more than 100  
108 members (De Bodt et al., 2005). These TFs are involved in almost every  
109 developmental process in plants (Smaczniak et al., 2012). However, their roles in seed  
110 germination are largely unexplored. Only two MADS-box genes were found  
111 regulating seed germination till now. One is *FLOWERING LOCUS C (FLC)/AGL25*,  
112 which is involved in temperature-dependent seed germination through influencing  
113 ABA catabolic pathway and GA biosynthetic pathway (Chiang et al., 2009). Another  
114 MADS-box gene *AGL67* may act as a repressor of seed germination, for knockout of  
115 it decreasing seed dormancy (Bassel et al., 2011). In our previous study, we found  
116 MADS-box TF *AGL21* is involved in lateral root development and growth mediated  
117 by various environmental and physiological signals (Yu et al., 2014). In this study, we  
118 report that *AGL21* also modulates seed germination by regulating ABA signaling.  
119 Overexpression of *AGL21* conferred hypersensitive seed germination to ABA, high

120 NaCl and mannitol, while the *AGL21* knockout mutants showed the opposite  
121 phenotypes. Further analyses showed that *AGL21* was induced by various stresses,  
122 and highly expressed in dry seeds, but decreased quickly after imbibition and  
123 germination, which is coincident with that of *ABI5*. Genetic analysis showed that  
124 *AGL21* was involved in ABA signaling, acting downstream of *ABI1/2* and upstream of  
125 *ABI5*. Taken together, our results suggest that *AGL21* integrate environmental signals  
126 and internal hormonal signals to ABA signaling by directly modulating *ABI5* to  
127 fine-tune seed germination and post-germination growth.

128

## 129 **RESULTS**

130

### 131 ***AGL21* negatively regulates seed germination and post-germination in response** 132 **to ABA, salt and osmotic stress**

133 *AGL21* was reported to be expressed in developing embryos (Burgeff et al., 2002),  
134 and our previous study showed that *AGL21* also had high expression levels in siliques  
135 and dry seeds besides in roots (Yu et al., 2014). These data indicates that *AGL21* may  
136 play some roles in seed development or seed germination. To study the function of  
137 *AGL21* in seed germination, we obtained 35S::*AGL21* (OX 1-6 and OX 3-5),  
138 35S::*AGL21-HA* (OX 29-3) transgenic *Arabidopsis* lines, and two T-DNA insertion  
139 mutants: CS118325 (*agl21-1*) and GK\_157C08 (*agl21-2*) from ABRC (Yu et al.,  
140 2014). Gene expression analyses by quantitative real-time polymerase chain reaction  
141 (qRT-PCR) showed that the expression of *AGL21* was abolished in the mutants while  
142 highly up-regulated in the *AGL21*-overexpressing plants (Fig. S1). To evaluate the  
143 function of *AGL21* in seed germination, we germinated the seeds of  
144 *AGL21*-overexpressing plants, *agl21* mutants and wild-type (WT) plants on MS  
145 media with or without ABA. In the absence of ABA, the seed germination rates of  
146 different genotypes were similar (Fig. 1A, B). In the presence of different  
147 concentrations of ABA, *agl21-1* and *agl21-2* seeds were more resistant to ABA  
148 inhibition. On the contrary, *AGL21*-overexpressing seeds were more sensitive to ABA  
149 during germination (Fig. 1A-D). In line with the germination rate data, *agl21* mutant

150 plants also showed higher cotyledon-greening percentages than WT plants, while the  
151 three *AGL21*-overexpressing lines exhibited significant lower cotyledon-greening rates  
152 after 8 days germination (Fig. 1E). These results suggested that *AGL21* acts as a  
153 negative regulator of seed germination and post-germination.

154 Since *AGL21* modulates ABA-regulated seed germination, we tested whether  
155 *AGL21* affects the seed germination response to salt stress. The seeds were sown on  
156 MS medium supplemented with 150 mM NaCl. Compared with WT seeds,  
157 germination and cotyledon-greening of *AGL21*-overexpressing seeds were more  
158 severely inhibited by NaCl, whereas the *agl21* mutant seeds showed much higher  
159 germination and cotyledon-greening ratios (Fig. 2A, C and E). To identify whether  
160 *AGL21* is involved in salt-specific or general osmotic responses, we further tested  
161 seed germination on medium containing osmotic reagent mannitol. Similarly, on MS  
162 medium containing 300 mM mannitol, germination of *AGL21*-overexpressing seeds  
163 were much more sensitive while the *agl21* mutant seeds were insensitive to the  
164 inhibition effects of mannitol compared with WT seeds (Fig. 2A, D and E), indicating  
165 *AGL21* negatively regulates seed germination in response to osmotic stress.

166

### 167 ***AGL21* is responsive to multiple stresses during seed germination**

168 *AGL21* responds to multiple endogenous and exogenous signals, such as ABA,  
169 methyl jasmonate (MeJA), indole-3-acetic acid (IAA), nitrogen (N) and sulfur (S)  
170 starvation during root development (Yu et al., 2014). Our results in this study show  
171 that *AGL21* is involved in the inhibition of germination in response to ABA, NaCl  
172 and osmotic stress. Thus we wanted to know whether *AGL21* also responded to these  
173 stress signals during germination stage. We analyzed the *AGL21* expression levels in  
174 seed germination stages on media with ABA, NaCl or mannitol. The results show that  
175 all these stress treatments significantly induced *AGL21* expression in germinating  
176 seed. Moreover, *AGL21* was also markedly induced by N deficiency, MeJA and IAA  
177 treatments during seed germination (Fig. 3A). These data support the surveillance  
178 function of *AGL21* in seed germination in response to ABA, salt and osmotic stresses,  
179 and maybe other stresses.

180

### 181 **AGL21 is involved in ABA signaling**

182 In order to study whether AGL21 is involved in ABA signaling, we checked the  
183 *AGL21* expression levels in *abi* mutants in response to ABA. As shown in Figure 3B  
184 and 3C, ABA and mannitol treatments could significantly induce *AGL21* expression in  
185 *abi3-8*, *abi4-1*, *abi5-7* background plants as that in WT background plants. However,  
186 in *abi1-1* and *abi2-2* background plants, no significant induction of *AGL21*  
187 transcription was observed. These data suggested that AGL21 might function in ABA  
188 signaling pathway, and may act downstream of ABI1 and ABI2, and upstream or in  
189 parallel with ABI3, ABI4 and ABI5.

190 We further analyzed the expression levels of several ABA signal pathway genes in  
191 germinating seeds of *AGL21*-overexpressing, knockout and WT plants germinated on  
192 MS medium or MS medium with ABA. We found that AGL21 positively regulated  
193 some downstream ABA signal pathway genes, such as *ABI5*, *AtEM6*, *RD29B* and *ABA*  
194 *RESPONSE ELEMENT-BINDING FACTOR 2 (AREB2)/AREB BIND FACTOR 4*  
195 *(AREB2/ABF4)* (Fig. 4A-H). However, gene expression levels of upstream ABA  
196 signal pathway genes, such as *ABI1*, *ABI2*, *SNF1-RELATED PROTEIN KINASE 2.2*  
197 *(SnRK2.2)* and *SnRK2.3*, did not change significantly in *AGL21*-overexpressing,  
198 knockout and WT plants (Fig. 4I-P). Together, these results indicate that AGL21 is  
199 involved in ABA signaling, and may act downstream of TYPE 2C PROTEIN  
200 PHOSPHATASES (PP2Cs) and SnRKs and upstream of ABI5 and other downstream  
201 ABA signal components to regulate seed germination and post-germination growth.

202

### 203 **AGL21 does not affect ABA and GA biosynthesis**

204 ABA and GA antagonistically govern seed germination. ABA promotes seed  
205 dormancy, while GA stimulates seed germination. To investigate whether AGL21  
206 regulates seed germination by altering ABA or GA content, we analyzed the  
207 expression levels of many key genes in ABA biosynthesis pathway, such as *ABA*  
208 *DEFICIENT 2 (ABA2)*, *ABA3*, *ARABIDOPSIS ALDEHYDE OXIDASE 3 (AAO3)*,  
209 *9-CIS-EPOXYCAROTENOID DIOXYGENASE (NCED3)*, and key ABA catabolic

210 enzyme family genes *CYP707A1–CYP707A4*. Our data show that all of these genes  
211 had similar expression levels in day 2 and day 3 germinating seeds of different  
212 genotypes both on MS and ABA media (Fig. S2). Moreover, we tested the ABA  
213 contents in dry seeds, and found there was no significant change in ABA contents  
214 between the WT, *agl21-1* and *AGL21*-overexpressing seeds (Fig. S3).

215 We also analyzed the expression levels of several key genes in GA biosynthesis  
216 pathway, including *ENT-COPALYL DIPHOSPHATE (CPS)*, *ENT-KAURENE*  
217 *SYNTHASE (KS)*, *ENT-KAURENOIC ACID OXIDASE 2 (KAO2)*, *GA20-OXIDASE 1*  
218 (*GA20OX1*), *GA20OX2*, *GA20OX3*, *GA REQUIRING 3 (GA3)*, *GA3-OXIDASE 1*  
219 (*GA3OX1*), *GA3OX2* and *GA3OX3*, in day 3 germinating seeds. qRT-PCR analysis  
220 revealed that the expression levels of the examined GA metabolism genes were  
221 largely unaltered in the *AGL21*-overexpressing, knockout and WT seeds grown on MS  
222 medium with or without ABA (Fig. S4). Taken together, these results show that  
223 *AGL21* does not alter ABA or GA content during seed germination and  
224 post-germination growth.

225

226 ***AGL21* has similar expression pattern to *ABI5* and regulates *ABI5* expression**  
227 **and protein accumulation in seeds**

228 To uncover the molecular networks underlying *AGL21* regulation of seed  
229 germination, we monitored the expression levels of genes associated with ABA  
230 dependent seed germination, such as *ABI1*, *ABI2*, *ABI3*, *ABI4*, *ABI5*, *MYB DOMAIN*  
231 *PROTEIN 96 (MYB96)*, *ACYL-COENZYME A-BINDING PROTEIN 1 (ACBP1)*,  
232 *ARABIDOPSIS HISTIDINE KINASE 1 (AHK1)*, *RING-H2 FINGER A2A (RHA2a)*,  
233 *RELATED TO ABI3/VPI 1 (RAVI)* (Tran et al., 2007; Bu et al., 2009; Du et al., 2013;  
234 Feng et al., 2014; Lee et al., 2015), in day 3 germinating seeds in the present of ABA.  
235 Among these genes, *ABI3*, *ABI4*, *ABI5* were found significantly up-regulated in  
236 *AGL21*-overexpressing plants. However, their expression was not significantly  
237 down-regulated in *agl21-1*, except *ABI5* (Fig. 5A), indicating that *ABI5* might be a  
238 target of *AGL21*.

239 Moreover, we found high levels of *AGL21* transcripts accumulated in WT dry



240 seeds, but the levels gradually dropped after 12-72 hours imbibition and continually  
241 decreased to a very low level after 1-3 days germination (Fig. 5B). However, when  
242 germinated on medium with ABA, *AGL21* expression was significantly induced by  
243 ABA during germination. Similar expression pattern of *AGL21* in  
244 *AGL21*-overexpressing seeds was also observed, except small increases during 1-3  
245 days germination on MS medium (Fig. 5B), which were probably due to the higher  
246 expression of *AGL21* in developing roots. The pattern of *AGL21* expression is similar  
247 to that of *ABI5* (Okamoto et al., 2010), and coincides with the content changes of  
248 ABA, which is also high in dry seeds but reduces rapidly after imbibition  
249 (Ali-Rachedi et al., 2004). We then compared the expression levels of *ABI5* in dry  
250 seeds, imbibed seeds and germinating seeds of *AGL21*-overexpressing and WT plants  
251 (Fig. 5C). *ABI5* showed a very similar expression pattern to *AGL21*. More importantly,  
252 expression of *ABI5* was significantly higher in *AGL21*-overexpressing seeds  
253 compared with that in WT seeds in most time-points checked, especially in seeds  
254 imbibed for 0-48 h and seeds germination on ABA medium for 24-72 h (Fig. 5C). In  
255 addition, one of *ABI5* target genes, *AtEM6*, also had a similar expression pattern to  
256 *ABI5* and *AGL21*, and also had increased expression levels in *AGL21*-overexpressing  
257 imbibed seeds, seeds germination on MS medium for 24 h and 72 h and seeds grown  
258 on ABA medium for 72 h (Fig. 5D). Furthermore, we also compared the expression  
259 profiles of *AGL21* and *ABI5* in seed using public expression data extracted from the  
260 *Arabidopsis* eFP browser (Winter et al., 2007). As data showed in Figure 5E, *AGL21*  
261 and *ABI5* have similar expression patterns in different seed development stages, with  
262 much higher expression levels of both genes at the late stages of seed development.  
263 Both of these two genes have the highest expression levels in dry seeds and  
264 dramatically decrease after 3-24 h imbibition (Fig. 5F). These data are consistent with  
265 our qRT-PCR analyses, implying that *AGL21* may directly regulate *ABI5* expression  
266 in seeds.

267       Since *ABI5* protein contents directly affect ABA-dependent seed germination  
268 and post-germination growth, we examined *ABI5* protein levels in seeds of WT,  
269 *AGL21*-overexpressing and *agl21-1* in the presence or absence of exogenous ABA. In

270 seeds germinated on MS medium for 3 days, no clear differences of ABI5 protein  
271 level were detected between the seed of different genotypes. However, in the present  
272 of ABA, significantly higher ABI5 protein levels accumulated in  
273 *AGL21*-overexpressing seeds, while significantly decreased in *agl21-1* seeds  
274 compared with WT seeds (Fig. 5G and H). All these results suggest that *AGL21*  
275 modulates ABI5 at both the transcriptional and protein levels.

276

### 277 ***ABI5* is one of the target genes of *AGL21* in regulating ABA-dependent seed** 278 **germination**

279 The expression pattern of *AGL21* shows high similarity to that of *ABI5* in seeds  
280 and its function in seed germination also similar to *ABI5*. To test whether *AGL21* acts  
281 in the same pathway to *ABI5* in seed germination, we generated 35S::*AGL21* plants in  
282 the genetic background of the *abi5-7* mutant (*abi5-7/AGL21OX 1-6*). As shown in  
283 ABA response assays, *AGL21OX 1-6* seeds were hypersensitive, however, the *abi5-7/*  
284 *AGL21OX 1-6* plants showed an ABA insensitive phenotype as that of *abi5-7* mutant  
285 (Fig. 6), suggesting that *AGL21* act upstream of *ABI5* in ABA signaling pathway to  
286 regulate seed germination.

287 MADS-box TFs can modulate their target genes expression by specifically  
288 binding as homo- or heterodimers to the flexible CArG-box (C-[A/T]rich-G)  
289 *cis*-element (Riechmann et al., 1996). Sequence analysis found that the *ABI5* promoter  
290 contains six putative binding sites (Fig. 7A), which contained a core sequence that  
291 meets the patterns for any of the possible three CArG-box motifs, C(A/T)<sub>8</sub>G,  
292 C(C/T)(A/T)<sub>6</sub>(A/G)G, or C(C/T)(A/T)G(A/T)<sub>4</sub>(A/G)G (de Folter and Angenent, 2006;  
293 Ito et al., 2008; Fujisawa et al., 2011). The presence of CArG-box motifs led us to  
294 examine whether *AGL21* is targeted to the *ABI5* promoter.

295 We performed chromatin immunoprecipitation (ChIP) assays using 4-day-old  
296 35S::*AGL21-HA* transgenic plants grown on MS medium or MS medium containing  
297 0.15 μM ABA. DNA fragments bound to epitope-tagged *AGL21* proteins were  
298 analyzed by qPCR assays. The ChIP-qPCR analysis demonstrated that the P5 DNA  
299 fragment was significantly enriched by *AGL21* both in plants grown on MS medium

300 or MS medium containing ABA, with much higher enrichment in the plants grown in  
301 the present of ABA (Fig. 7B). However, other four genomic fragments containing  
302 putative CArG-box motif were not enriched. In addition, none of the five genomic  
303 fragments was found enriched by AGL21 in WT plants (Fig. 7B). All these data  
304 support the specific interaction of AGL21 with the P5 region of the *ABI5* promoter.

305 To verify that AGL21 directly regulates *ABI5* expression, we checked the  
306 expression levels of *ABI5*-targeted genes *AtEM1* and *AtEM6* in seeds sown on MS  
307 media or MS media with 0.2  $\mu$ M ABA for three days. As shown in Figure 7C, on MS  
308 medium, *AtEM6* was up-regulated in *AGL21*-overexpressing seeds, and significantly  
309 down-regulated in *agl21-1*, *AGL21OX 1-6/abi5-7*, and *abi5-7* compared with WT. As  
310 for *AtEM1*, only significantly decreased expression level in *abi5-7* seeds was  
311 observed on MS medium (Fig. 7D). On MS medium supplemented with ABA, the  
312 expression levels of both *AtEM1* and *AtEM6* markedly increased in  
313 *AGL21*-overexpressing seeds, while significantly reduced in *agl21-1* seeds. However,  
314 when *AGL21* was overexpressed in *abi5* background (*AGL21OX 1-6/abi5-7*), similar  
315 expression levels of *AtEM1* and *AtEM6* were observed to that of *abi5-7* seeds (Fig. 7C  
316 and D), indicating that AGL21-upregulated *AtEM1* and *AtEM6* expression is  
317 *ABI5*-dependent. These results confirm that *ABI5* is a target gene of AGL21.

318

## 319 **DISCUSSION**

320 There are more than 100 MADS-box genes found in *Arabidopsis* genome  
321 (Gramzow and Theissen, 2013), with functions in the morphogenesis of almost all  
322 plant organs and throughout the whole life cycle (Smaczniak et al., 2012). However,  
323 their functions in seed dormancy and germination are largely unknown. So far, only  
324 two MADS-box gene, *FLC* and *AGL67*, were reported involved in seed germination  
325 (Chiang et al., 2009; Bassel et al., 2011). Recently, gene expression profiling analysis  
326 identified three MADS-box genes, including *AGL21*, were differentially expressed  
327 between imbibed dormant and after-ripened ecotype C24 seeds, suggesting putative  
328 functions of these genes in seed dormancy and germination (Barrero et al., 2010). In  
329 this study, we discovered that AGL21 regulated ABA-mediated seed germination and

330 post-germination growth by modulating ABA signaling.

331 We found that *AGL21* acts as a negative regulator in seed germination. *AGL21* is  
332 primarily expressed in root, but also has high expression levels in siliques and dry  
333 seeds, and it responds to multiple environmental and internal signals both in  
334 germinating seeds and roots (Fig. 3) (Yu et al., 2014). Overexpression of *AGL21*  
335 results in hypersensitivity of seed germination to ABA, high salt, and osmotic stress,  
336 while knockout *AGL21* confers opposite phenotypes during germination (Fig. 1 and  
337 Fig. 2). Seed germination is tightly regulated by ABA:GA balance and ABA signaling  
338 in seed (Finch-Savage and Leubner-Metzger, 2006). We found that *AGL21* does not  
339 affect ABA and GA biosynthesis or catabolism (Fig. S2-S4), indicating that  
340 *AGL21*-regulated seed germination is not through affecting ABA or GA content. Our  
341 further analyses of *AGL21* expression in *abi* mutants (Fig. 4) and ABA signal pathway  
342 genes expression in *agl21-1*, *AGL21*-overexpression, and WT seeds (Fig. 5) indicate  
343 that *AGL21* is involved in ABA signal pathway to regulate seed germination and may  
344 acts downstream of PP2Cs and SnRKs, but upstream of *ABI5* and other  
345 ABA-responsive genes.

346 As a key player in ABA-triggered arrest of germination and post-germination  
347 growth, *ABI5* is regulated at both transcriptional and post-transcriptional levels.  
348 Several genes, such as *WRKY2*, *RAV1*, *MYB7*, *SALT- AND DROUGHT-INDUCED*  
349 *RING FINGER1 (SDIR1)*, *SDIR1-INTERACTING PROTEIN1 (SDIRIP1)*, *HY5*,  
350 *B-BOX21 (BBX21)*, *DELAY OF GERMINATION 1 (DOG1)*, NUCLEAR FACTOR-Y  
351 C- RGA-LIKE 2 (NF-YC-RGL2), were reported to regulate seed germination by  
352 modulating *ABI5* expression directly or indirectly (Zhang et al., 2007; Chen et al.,  
353 2008; Jiang and Yu, 2009; Feng et al., 2014; Xu et al., 2014; Kim et al., 2015; Zhang  
354 et al., 2015; Dekkers et al., 2016; Liu et al., 2016). Our current study implicates that  
355 *AGL21* can directly regulate *ABI5* expression during seed germination. Firstly, we  
356 found *AGL21* and *ABI5* had similar expression patterns during seed development and  
357 germination. *ABI5* is expressed throughout seed development, reaching the highest  
358 transcript level at mature seed stage, but dropping during imbibition and germination  
359 unless exposed to stresses (Fig. 5C) (Brocard et al., 2002). Here, we found that the

360 expression pattern of *AGL21* in seeds is in accord with that of *ABI5* (Fig. 5B- 5F) and  
361 ABA content changes in seeds during the same period. These results imply a possible  
362 regulation between these two genes. Further qRT-PCR analyses found that among 10  
363 seed germination related genes, only *ABI5* had significantly increased expression  
364 level in *AGL21*-overexpressing germinating seeds, with significantly reduced  
365 expression in *agl21-1* seeds (Fig. 5A). Then we found *ABI5* and its target gene *AtEM6*  
366 had markedly elevated expression in *AGL21*-overexpressing dry seeds, imbibed seeds,  
367 germinating seeds grown on MS or ABA media (Fig. 5C and D). Moreover, more  
368 *ABI5* protein was accumulated in *AGL21*-overexpression germinating seeds, while  
369 down-regulated in *agl21-1* seeds on ABA media at the same time (Fig. 5G and H). In  
370 addition, genetics evidence found that *AGL21*-regulated seed germination is depend  
371 on *ABI5*. When overexpressing *AGL21* in *abi5* background (*abi5-7/AGL21OX1-6*),  
372 the hypersensitive seed germination to ABA was abolished, instead  
373 *abi5-7/AGL21OX1-6* seeds showed similar sensitivity to *abi5* (Fig. 6). Taken together,  
374 these data suggest that *AGL21* acts upstream of *ABI5*, and may directly modulate  
375 *ABI5* transcription.

376 To verify whether *ABI5* is the direct target of *AGL21*, ChIP-qPCR assay was  
377 carried out. We found one promoter DNA fragment containing a putative CARG-box  
378 *cis*-element of *ABI5* was significantly enriched in 4-day-old plants grown on MS or  
379 MS medium containing ABA (Fig. 7A and B), indicating that *AGL21* directly binding  
380 to *ABI5* promoter to regulate its expression. *AtEM1* and *AtEM6*, two target gene of  
381 *ABI5* (Carles et al., 2002), were markedly up-regulated in *AGL21*-overexpressing  
382 plants and down-regulated in *agl21-1* plants as that of *ABI5*. However, once *ABI5* was  
383 mutated in *AGL21*-overexpressing background, the induction of *AtEM1* and *AtEM6*  
384 expression was blocked (Fig. 7C and D). Together, these data support the idea that  
385 *AGL21* regulates seed germination by directly modulating *ABI5*. Although we also  
386 found other seed germination regulator genes, such as *ABI3*, *ABI4* and *ABF4*, were  
387 up-regulated in *AGL21*-overexpressing plants (Fig. 5H and Fig. 5A), the relationships  
388 of these genes to *AGL21* await further investigation.

389 Timing of germination is a complex biological process that is regulated through

390 intricate signaling pathways integrating diverse environmental signals, such as light,  
391 temperature, water, soil salinity and nutrition, into internal developmental programs,  
392 such as endogenous hormone signaling (Finkelstein et al., 2008; Jiang et al., 2016).  
393 For example, both osmotic and salinity stresses inhibit seed germination by affecting  
394 ABA signal pathway (Llanes et al., 2016).  $\text{NO}_3^-$  can act as a seed germination  
395 enhancer by decreasing the level of ABA in the seed (Finkelstein et al., 2008; Osuna  
396 et al., 2015; Yan et al., 2016). Sulfate availability affects germination response to  
397 ABA and salt stress in *Arabidopsis* by regulating ABA biosynthesis (Cao et al., 2014).  
398 GA, ethylene, brassinosteroids and cytokinin have been shown to promote seed  
399 germination, while ABA, auxin, JA, SA inhibit seed germination (Kucera et al., 2005;  
400 Finkelstein et al., 2008; Wang et al., 2011; Liu et al., 2013; Shu et al., 2016). All these  
401 different phytohormones modulate seed germination most likely by regulating the  
402 ABA/GA balance at either the signaling or biogenesis levels, with ABI5 as one of the  
403 pivots involved in hormone crosstalk (Shu et al., 2016). Thus, the molecular links that  
404 incorporate external signals into internal plant hormonal signaling are crucial for  
405 seeds to germinate at proper time in the changing environment. We have demonstrated  
406 in this paper that AGL21 is a negative regulator of seed germination. *AGL21* responds  
407 to a variety of internal and external signals, such as ABA, MeJA, IAA, osmotic stress,  
408 salt stress, N and S deficiency (Fig. 3A), which are known to affect seed germination.  
409 Therefore, we propose that AGL21 may serve as environmental surveillance for seed  
410 germination. It controls seed germination by regulating ABI5 according to its  
411 environmental surveillance, which prevents seed germination under adverse  
412 conditions, an adaptive mechanism for plant survival.

413

## 414 **METHODS**

415

### 416 **Plant Material and Growth Conditions**

417 *Arabidopsis* Columbia-0 (Col-0) ecotype was used in this study. *AGL21*-  
418 overexpressing lines, such as *AGL21OX* 1-6 and *AGL21OX* 3-5, and mutants, such as  
419 *agl21-1* and *agl21-2* were reported previously (Yu et al., 2014). 35S::*AGL21-HA*

420 transgenic line *AGL21OX* 29-3 was obtained from *Agrobacterium*  
421 *tumefaciens*-mediated transformation with 35S::*AGL21-HA* construct. To get  
422 35S::*AGL21-HA* construct, the coding region of *AGL21* was amplified and cloned into  
423 pDONR207 with the primers *AGL21-HA* LP and *AGL21-HA* RP, and then shuttled it  
424 into pCB2004 vector (Lei et al., 2007). The *AGL21OX* 1-6/*abi5-7* double mutant was  
425 generated by genetic cross of *AGL21OX* 1-6 and *abi5-7* mutant. All plants were  
426 grown at 22°C under long-day condition (16-h light/8-h dark cycles).

#### 427 **Seed germination assays**

428 Seeds were collected at the same time were used for germination assays. Harvested  
429 seeds were aired dried at room temperature at least 3 weeks before the germination  
430 assays. For seed germination assays, seeds of each genotype were surface sterilized  
431 with 10% bleach for 12 min and washed five times with sterile water, and then were  
432 stratified at 4°C for 2 days in darkness before sown on MS medium (1% sucrose, 0.5 %  
433 agar, pH 5.8) or MS medium supplemented with ABA, NaCl or mannitol. Seeds were  
434 germinated at 22°C under 16-h light/8-h dark cycles. Germination (emergence of  
435 radicles) and post-germination growth (green cotyledon appearance) were scored at  
436 the indicated time points.

#### 437 **qRT-PCR assay**

438 Total RNA of seedlings was extracted with Trizol reagent (Invitrogen) and RNAs  
439 from dry seeds, imbibed seeds and germinating seeds were isolated using a  
440 TRIzol-based two-step method as previously described (Meng and Feldman, 2010).  
441 Total RNA samples were pretreated with DNase I (RNase Free) and 1.5 µg of total  
442 RNA was used for reverse transcription with oligo (dT)<sub>18</sub> to synthesize first-strand  
443 cDNA. qRT-PCR was performed with a StepOne Plus Real Time PCR System by  
444 using a TaKaRa SYBR Premix Ex Taq II reagent kit as described previously (Yu et al.,  
445 2013). All primers used are listed in Supplemental Table S1.

#### 446 **Quantification of ABA**

447 Dry seeds were ground in liquid nitrogen and ABA contents were measured by the  
448 ABA immunoassay kit as described (Yang et al., 2001).

#### 449 **ChIP-qPCR assay**

450 The ChIP assay was performed as reported previously (Cai et al., 2014).  
451 35S::*AGL21-HA* transgenic plants (OX 29-3), anti-HA antibodies (Abmart), and  
452 salmon sperm DNA/protein A agarose beads (Millipore, USA) were used for ChIP  
453 experiment. DNA was purified using phenol/ chloroform (1:1, v/v) and precipitated.  
454 The enrichments of DNA fragments was quantified by qPCR using specific primers  
455 (Supplemental Table S1). Enriched values were normalized with the level of input  
456 DNA.

#### 457 **Western blot**

458 For western blot analysis, germinating seeds were powdered with liquid nitrogen and  
459 proteins were extracted with RIPA buffer [50 mmol/L Tris-HCl, pH 8.0, 0.1% Nonidet  
460 P-40, 150 mmol/L NaCl, 1% sodium dodecyl sulfate, 0.5% sodium deoxycholate,  
461 and protease inhibitor cocktail tablets (Roche)]. Protein contents were determined  
462 using the Bradford method. Proteins were separated on 12% SDS-PAGE and  
463 electrotransferred to nitrocellulose membrane (Immobilon-P, MILLIPORE  
464 Corporation, USA). Anti-ABI5 antibody (Abiocode) at 1:1000 dilution was used for  
465 protein immunoblotting as previously described (Liu and Stone, 2010). The results  
466 were detected using a CCD camera system (Image Quant LAS 4000) using Super  
467 Signal West Femto Trial Kit (Thermo, USA).

#### 468 **Statistical analysis**

469 Statistically significant differences were computed based on the Student's *t*-tests.

470

#### 471 **SUPPLEMENTARY DATA**

472 **Figure S1.** Expression level analyses of *AGL21*-overexpressing and knockout  
473 mutants.

474 **Figure S2.** Expression levels of ABA biosynthetic and catabolic pathway genes.

475 **Figure S3.** ABA contents in dry seeds of WT, *AGL21*-overexpressing and knockout  
476 mutant plants.

477 **Figure S4.** Expression levels of GA biosynthetic pathway genes.

478 **Table S1.** Primers used for PCR.

479



480 **FUNDING**

481 This work was supported by the China National Natural Science Funds for  
482 Distinguished Young Scholar (grant no. 31500231), China Postdoctoral Science  
483 Foundation, No.9 Special Fund (grant no.2016T90577).

484

485 **AUTHOR CONTRIBUTIONS**

486 L.-H.Y. and C.-B.X. designed the experiments; L.-H.Y. performed experiments and  
487 data analysis, and wrote the manuscript; J.W., Z.-Q.M., P.-X.Z., and Z.W. contributed  
488 to assist in performing part of the experiments; C.-B.X. supervised the project and  
489 revised the manuscript.

490

491 **ACKNOWLEDGEMENTS**

492 We thank Dr. Chuan-You Li (Institute of Genetics and Developmental Biology,  
493 Chinese Academy of Sciences) for kindly providing *abi5-7* mutant. We also thank the  
494 ABRC for providing T-DNA insertion lines used in this study.

495

496

497 **REFERENCES**

- 498 **Albertos, P., Romero-Puertas, M.C., Tatematsu, K., Mateos, I., Sanchez-Vicente, I., Nambara, E., and**  
499 **Lorenzo, O.** (2015). S-nitrosylation triggers ABI5 degradation to promote seed germination and  
500 seedling growth. *Nat Commun* **6**, 8669, doi: 10.1038/ncomms9669.
- 501 **Ali-Rachedi, S., Bouinot, D., Wagner, M.H., Bonnet, M., Sotta, B., Grappin, P., and Jullien, M.** (2004).  
502 Changes in endogenous abscisic acid levels during dormancy release and maintenance of mature  
503 seeds: studies with the Cape Verde Islands ecotype, the dormant model of *Arabidopsis thaliana*.  
504 *Planta* **219**, 479-488.
- 505 **Barrero, J.M., Millar, A.A., Griffiths, J., Czechowski, T., Scheible, W.R., Udvardi, M., Reid, J.B., Ross,**  
506 **J.J., Jacobsen, J.V., and Gubler, F.** (2010). Gene expression profiling identifies two regulatory genes  
507 controlling dormancy and ABA sensitivity in *Arabidopsis* seeds. *Plant J* **61**, 611-622.
- 508 **Bassel, G.W., Lan, H., Glaab, E., Gibbs, D.J., Gerjets, T., Krasnogor, N., Bonner, A.J., Holdsworth, M.J.,**  
509 **and Provart, N.J.** (2011). Genome-wide network model capturing seed germination reveals  
510 coordinated regulation of plant cellular phase transitions. *Proc Natl Acad Sci U S A* **108**, 9709-9714.
- 511 **Bewley, J.D.** (1997). Seed Germination and Dormancy. *Plant Cell* **9**, 1055-1066.
- 512 **Brocard, I.M., Lynch, T.J., and Finkelstein, R.R.** (2002). Regulation and role of the *Arabidopsis* abscisic  
513 acid-insensitive 5 gene in abscisic acid, sugar, and stress response. *Plant Physiol* **129**, 1533-1543.
- 514 **Bu, Q., Li, H., Zhao, Q., Jiang, H., Zhai, Q., Zhang, J., Wu, X., Sun, J., Xie, Q., Wang, D., and Li, C.**

- 515 (2009). The Arabidopsis RING finger E3 ligase RHA2a is a novel positive regulator of abscisic acid  
516 signaling during seed germination and early seedling development. *Plant Physiol* **150**, 463-481.
- 517 **Burgeff, C., Liljegren, S.J., Tapia-Lopez, R., Yanofsky, M.F., and Alvarez-Buylla, E.R.** (2002). MADS-box  
518 gene expression in lateral primordia, meristems and differentiated tissues of Arabidopsis thaliana  
519 roots. *Planta* **214**, 365-372.
- 520 **Cai, X.T., Xu, P., Zhao, P.X., Liu, R., Yu, L.H., and Xiang, C.B.** (2014). Arabidopsis ERF109 mediates  
521 cross-talk between jasmonic acid and auxin biosynthesis during lateral root formation. *Nat Commun*  
522 **5**, 5833, doi: 10.1038/ncomms6833.
- 523 **Cao, M.J., Wang, Z., Zhao, Q., Mao, J.L., Speiser, A., Wirtz, M., Hell, R., Zhu, J.K., and Xiang, C.B.**  
524 (2014). Sulfate availability affects ABA levels and germination response to ABA and salt stress in  
525 Arabidopsis thaliana. *Plant J* **77**, 604-615.
- 526 **Carles, C., Bies-Etheve, N., Aspart, L., Leon-Kloosterziel, K.M., Koornneef, M., Echeverria, M., and**  
527 **Delseny, M.** (2002). Regulation of Arabidopsis thaliana Em genes: role of ABI5. *Plant J* **30**, 373-383.
- 528 **Chen, H., Zhang, J., Neff, M.M., Hong, S.W., Zhang, H., Deng, X.W., and Xiong, L.** (2008). Integration  
529 of light and abscisic acid signaling during seed germination and early seedling development. *Proc*  
530 *Natl Acad Sci U S A* **105**, 4495-4500.
- 531 **Chiang, G.C., Barua, D., Kramer, E.M., Amasino, R.M., and Donohue, K.** (2009). Major flowering time  
532 gene, flowering locus C, regulates seed germination in Arabidopsis thaliana. *Proc Natl Acad Sci U S A*  
533 **106**, 11661-11666.
- 534 **Dai, M., Xue, Q., McCray, T., Margavage, K., Chen, F., Lee, J.H., Nezames, C.D., Guo, L., Terzaghi, W.,**  
535 **Wan, J., Deng, X.W., and Wang, H.** (2013). The PP6 phosphatase regulates ABI5 phosphorylation and  
536 abscisic acid signaling in Arabidopsis. *Plant Cell* **25**, 517-534.
- 537 **De Bodt, S., Maere, S., and Van de Peer, Y.** (2005). Genome duplication and the origin of angiosperms.  
538 *Trends Ecol Evol* **20**, 591-597.
- 539 **de Folter, S., and Angenent, G.C.** (2006). trans meets cis in MADS science. *Trends Plant Sci* **11**,  
540 224-231.
- 541 **Dekkers, B.J.W., He, H.Z., Hanson, J., Willems, L.A.J., Jamar, D.C.L., Cueff, G., Rajjou, L., Hilhorst,**  
542 **H.W.M., and Bentsink, L.** (2016). The Arabidopsis DELAY OF GERMINATION 1 gene affects ABSCISIC  
543 ACID INSENSITIVE 5 (ABI5) expression and genetically interacts with ABI3 during Arabidopsis seed  
544 development. *Plant Journal* **85**, 451-465.
- 545 **Du, Z.Y., Chen, M.X., Chen, Q.F., Xiao, S., and Chye, M.L.** (2013). Arabidopsis acyl-CoA-binding protein  
546 ACBP1 participates in the regulation of seed germination and seedling development. *Plant J* **74**,  
547 294-309.
- 548 **Feng, C.Z., Chen, Y., Wang, C., Kong, Y.H., Wu, W.H., and Chen, Y.F.** (2014). Arabidopsis RAV1  
549 transcription factor, phosphorylated by SnRK2 kinases, regulates the expression of ABI3, ABI4, and  
550 ABI5 during seed germination and early seedling development. *Plant Journal* **80**, 654-668.
- 551 **Finch-Savage, W.E., and Leubner-Metzger, G.** (2006). Seed dormancy and the control of germination.  
552 *New Phytologist* **171**, 501-523.
- 553 **Finkelstein, R., Reeves, W., Ariizumi, T., and Steber, C.** (2008). Molecular aspects of seed dormancy.  
554 *Annu Rev Plant Biol* **59**, 387-415.
- 555 **Finkelstein, R., Gampala, S.S., Lynch, T.J., Thomas, T.L., and Rock, C.D.** (2005). Redundant and distinct  
556 functions of the ABA response loci ABA-INSENSITIVE(ABI)5 and ABRE-BINDING FACTOR (ABF)3. *Plant*  
557 *Mol Biol* **59**, 253-267.
- 558 **Finkelstein, R.R., Gampala, S.S., and Rock, C.D.** (2002). Abscisic acid signaling in seeds and seedlings.

- 559 Plant Cell **14 Suppl**, S15-45.
- 560 **Finkelstein, R.R., Wang, M.L., Lynch, T.J., Rao, S., and Goodman, H.M.** (1998). The Arabidopsis  
561 abscisic acid response locus ABI4 encodes an APETALA 2 domain protein. Plant Cell **10**, 1043-1054.
- 562 **Fujisawa, M., Nakano, T., and Ito, Y.** (2011). Identification of potential target genes for the tomato  
563 fruit-ripening regulator RIN by chromatin immunoprecipitation. BMC Plant Biol **11**, 26.
- 564 **Giraudat, J., Hauge, B.M., Valon, C., Smalle, J., Parcy, F., and Goodman, H.M.** (1992). Isolation of the  
565 Arabidopsis ABI3 gene by positional cloning. Plant Cell **4**, 1251-1261.
- 566 **Gramzow, L., and Theissen, G.** (2013). Phylogenomics of MADS-Box Genes in Plants - Two Opposing  
567 Life Styles in One Gene Family. Biology (Basel) **2**, 1150-1164.
- 568 **Holdsworth, M.J., Bentsink, L., and Soppe, W.J.** (2008). Molecular networks regulating Arabidopsis  
569 seed maturation, after-ripening, dormancy and germination. New Phytol **179**, 33-54.
- 570 **Ito, Y., Kitagawa, M., Ihashi, N., Yabe, K., Kimbara, J., Yasuda, J., Ito, H., Inakuma, T., Hiroi, S., and**  
571 **Kasumi, T.** (2008). DNA-binding specificity, transcriptional activation potential, and the rin mutation  
572 effect for the tomato fruit-ripening regulator RIN. Plant J **55**, 212-223.
- 573 **Jiang, W., and Yu, D.** (2009). Arabidopsis WRKY2 transcription factor mediates seed germination and  
574 postgermination arrest of development by abscisic acid. BMC Plant Biol **9**, 96.
- 575 **Jiang, Z., Xu, G., Jing, Y., Tang, W., and Lin, R.** (2016). Phytochrome B and REVELLE1/2-mediated  
576 signalling controls seed dormancy and germination in Arabidopsis. Nat Commun **7**, 12377, doi:  
577 10.1038/ncomms12377..
- 578 **Kim, J.H., Hyun, W.Y., Nguyen, H.N., Jeong, C.Y., Xiong, L., Hong, S.W., and Lee, H.** (2015). AtMyb7, a  
579 subgroup 4 R2R3 Myb, negatively regulates ABA-induced inhibition of seed germination by blocking  
580 the expression of the bZIP transcription factor ABI5. Plant Cell Environ **38**, 559-571.
- 581 **Kucera, B., Cohn, M.A., and Leubner-Metzger, G.** (2005). Plant hormone interactions during seed  
582 dormancy release and germination. Seed Sci Res **15**, 281-307.
- 583 **Lee, K., Lee, H.G., Yoon, S., Kim, H.U., and Seo, P.J.** (2015). The Arabidopsis MYB96 Transcription  
584 Factor Is a Positive Regulator of ABSCISIC ACID-INSENSITIVE4 in the Control of Seed Germination.  
585 Plant Physiol **168**, 677-689.
- 586 **Lei, Z.Y., Zhao, P., Cao, M.J., Cui, R., Chen, X., Xiong, L.Z., Zhang, Q.F., Oliver, D.J., and Xiang, C.B.**  
587 (2007). High-throughput binary vectors for plant gene function analysis. Journal of Integrative Plant  
588 Biology **49**, 556-567.
- 589 **Liu, H., and Stone, S.L.** (2010). Abscisic acid increases Arabidopsis ABI5 transcription factor levels by  
590 promoting KEG E3 ligase self-ubiquitination and proteasomal degradation. Plant Cell **22**, 2630-2641.
- 591 **Liu, X., Hu, P., Huang, M., Tang, Y., Li, Y., Li, L., and Hou, X.** (2016). The NF-YC-RGL2 module integrates  
592 GA and ABA signalling to regulate seed germination in Arabidopsis. Nat Commun **7**, 12768, doi:  
593 10.1038/ncomms12768.
- 594 **Liu, X.D., Zhang, H., Zhao, Y., Feng, Z.Y., Li, Q., Yang, H.Q., Luan, S., Li, J.M., and He, Z.H.** (2013). Auxin  
595 controls seed dormancy through stimulation of abscisic acid signaling by inducing ARF-mediated  
596 ABI3 activation in Arabidopsis. Proc Natl Acad Sci USA **110**, 15485-15490.
- 597 **Llanes, A., Andrade, A., Masciarelli, O., Alemano, S., and Luna, V.** (2016). Drought and salinity alter  
598 endogenous hormonal profiles at the seed germination phase. Seed Sci Res **26**, 1-13.
- 599 **Lopez-Molina, L., Mongrand, S., and Chua, N.H.** (2001). A postgermination developmental arrest  
600 checkpoint is mediated by abscisic acid and requires the ABI5 transcription factor in Arabidopsis.  
601 Proc Natl Acad Sci U S A **98**, 4782-4787.
- 602 **Lopez-Molina, L., Mongrand, B., McLachlin, D.T., Chait, B.T., and Chua, N.H.** (2002). ABI5 acts

- 603 downstream of ABI3 to execute an ABA-dependent growth arrest during germination. *Plant Journal*  
604 **32**, 317-328.
- 605 **Meng, L., and Feldman, L.** (2010). A rapid TRIzol-based two-step method for DNA-free RNA extraction  
606 from *Arabidopsis* siliques and dry seeds. *Biotechnol J* **5**, 183-186.
- 607 **Miura, K., Lee, J., Jin, J.B., Yoo, C.Y., Miura, T., and Hasegawa, P.M.** (2009). Sumoylation of ABI5 by the  
608 *Arabidopsis* SUMO E3 ligase SIZ1 negatively regulates abscisic acid signaling. *Proc Natl Acad Sci U S A*  
609 **106**, 5418-5423.
- 610 **Nakashima, K., Fujita, Y., Katsura, K., Maruyama, K., Narusaka, Y., Seki, M., Shinozaki, K., and**  
611 **Yamaguchi-Shinozaki, K.** (2006). Transcriptional regulation of ABI3- and ABA-responsive genes  
612 including RD29B and RD29A in seeds, germinating embryos, and seedlings of *Arabidopsis*. *Plant Mol*  
613 *Biol* **60**, 51-68.
- 614 **Nambara, E., and Marion-Poll, A.** (2003). ABA action and interactions in seeds. *Trends Plant Sci* **8**,  
615 213-217.
- 616 **Okamoto, M., Tatematsu, K., Matsui, A., Morosawa, T., Ishida, J., Tanaka, M., Endo, T.A., Mochizuki,**  
617 **Y., Toyoda, T., Kamiya, Y., Shinozaki, K., Nambara, E., and Seki, M.** (2010). Genome-wide analysis of  
618 endogenous abscisic acid-mediated transcription in dry and imbibed seeds of *Arabidopsis* using tiling  
619 arrays. *Plant J* **62**, 39-51.
- 620 **Osuna, D., Prieto, P., and Aguilar, M.** (2015). Control of Seed Germination and Plant Development by  
621 Carbon and Nitrogen Availability. *Front Plant Sci* **6**, 1023.
- 622 **Parcy, F., Valon, C., Raynal, M., Gaubier-Comella, P., Delseny, M., and Giraudat, J.** (1994). Regulation  
623 of gene expression programs during *Arabidopsis* seed development: roles of the ABI3 locus and of  
624 endogenous abscisic acid. *Plant Cell* **6**, 1567-1582.
- 625 **Riechmann, J.L., Wang, M., and Meyerowitz, E.M.** (1996). DNA-binding properties of *Arabidopsis*  
626 MADS domain homeotic proteins APETALA1, APETALA3, PISTILLATA and AGAMOUS. *Nucleic Acids*  
627 *Res* **24**, 3134-3141.
- 628 **Seo, M., Hanada, A., Kuwahara, A., Endo, A., Okamoto, M., Yamauchi, Y., North, H., Marion-Poll, A.,**  
629 **Sun, T.P., Koshiba, T., Kamiya, Y., Yamaguchi, S., and Nambara, E.** (2006). Regulation of hormone  
630 metabolism in *Arabidopsis* seeds: phytochrome regulation of abscisic acid metabolism and abscisic  
631 acid regulation of gibberellin metabolism. *Plant J* **48**, 354-366.
- 632 **Shu, K., Liu, X.D., Xie, Q., and He, Z.H.** (2016). Two Faces of One Seed: Hormonal Regulation of  
633 Dormancy and Germination. *Mol Plant* **9**, 34-45.
- 634 **Shu, K., Zhang, H., Wang, S., Chen, M., Wu, Y., Tang, S., Liu, C., Feng, Y., Cao, X., and Xie, Q.** (2013).  
635 ABI4 regulates primary seed dormancy by regulating the biogenesis of abscisic acid and gibberellins  
636 in *arabidopsis*. *PLoS Genet* **9**, e1003577, doi:10.1371/journal.pgen.1003577.
- 637 **Smaczniak, C., Immink, R.G., Angenent, G.C., and Kaufmann, K.** (2012). Developmental and  
638 evolutionary diversity of plant MADS-domain factors: insights from recent studies. *Development* **139**,  
639 3081-3098.
- 640 **Stone, S.L., Williams, L.A., Farmer, L.M., Vierstra, R.D., and Callis, J.** (2006). KEEP ON GOING, a RING  
641 E3 ligase essential for *Arabidopsis* growth and development, is involved in abscisic acid signaling.  
642 *Plant Cell* **18**, 3415-3428.
- 643 **Tran, L.S., Urao, T., Qin, F., Maruyama, K., Kakimoto, T., Shinozaki, K., and Yamaguchi-Shinozaki, K.**  
644 (2007). Functional analysis of AHK1/ATHK1 and cytokinin receptor histidine kinases in response to  
645 abscisic acid, drought, and salt stress in *Arabidopsis*. *Proc Natl Acad Sci U S A* **104**, 20623-20628.
- 646 **Wang, Y., Li, L., Ye, T., Zhao, S., Liu, Z., Feng, Y.Q., and Wu, Y.** (2011). Cytokinin antagonizes ABA

647 suppression to seed germination of Arabidopsis by downregulating ABI5 expression. *Plant J* **68**,  
648 249-261.

649 **Winter, D., Vinegar, B., Nahal, H., Ammar, R., Wilson, G.V., and Provart, N.J.** (2007). An "Electronic  
650 Fluorescent Pictograph" Browser for Exploring and Analyzing Large-Scale Biological Data Sets. *Plos*  
651 *One* **2**: e718. doi:10.1371/journal.pone.0000718.

652 **Xu, D., Li, J., Gangappa, S.N., Hettiarachchi, C., Lin, F., Andersson, M.X., Jiang, Y., Deng, X.W., and**  
653 **Holm, M.** (2014). Convergence of Light and ABA signaling on the ABI5 promoter. *PLoS Genet* **10**,  
654 e1004197, doi:10.1371/journal.pgen.1004197.

655 **Yan, D., Easwaran, V., Chau, V., Okamoto, M., Ierullo, M., Kimura, M., Endo, A., Yano, R., Pasha, A.,**  
656 **Gong, Y., Bi, Y.M., Provart, N., Guttman, D., Krapp, A., Rothstein, S.J., and Nambara, E.** (2016).  
657 NIN-like protein 8 is a master regulator of nitrate-promoted seed germination in Arabidopsis. *Nat*  
658 *Commun* **7**, 13179, doi: 10.1038/ncomms13179.

659 **Yang, J., Zhang, J., Wang, Z., Zhu, Q., and Wang, W.** (2001). Hormonal changes in the grains of rice  
660 subjected to water stress during grain filling. *Plant Physiol* **127**, 315-323.

661 **Yu, L.H., Miao, Z.Q., Qi, G.F., Wu, J., Cai, X.T., Mao, J.L., and Xiang, C.B.** (2014). MADS-box  
662 transcription factor AGL21 regulates lateral root development and responds to multiple external and  
663 physiological signals. *Mol Plant* **7**, 1653-1669.

664 **Yu, L.H., Chen, X., Wang, Z., Wang, S.M., Wang, Y.P., Zhu, Q.S., Li, S.G., and Xiang, C.B.** (2013).  
665 Arabidopsis Enhanced Drought Tolerance1/HOMEODOMAIN GLABROUS11 Confers Drought  
666 Tolerance in Transgenic Rice without Yield Penalty. *Plant Physiology* **162**, 1378-1391.

667 **Zhang, H., Cui, F., Wu, Y., Lou, L., Liu, L., Tian, M., Ning, Y., Shu, K., Tang, S., and Xie, Q.** (2015). The  
668 RING finger ubiquitin E3 ligase SDIR1 targets SDIR1-INTERACTING PROTEIN1 for degradation to  
669 modulate the salt stress response and ABA signaling in Arabidopsis. *Plant Cell* **27**, 214-227.

670 **Zhang, Y., Yang, C., Li, Y., Zheng, N., Chen, H., Zhao, Q., Gao, T., Guo, H., and Xie, Q.** (2007). SDIR1 is a  
671 RING finger E3 ligase that positively regulates stress-responsive abscisic acid signaling in Arabidopsis.  
672 *Plant Cell* **19**, 1912-1929.

673

674

675

676 **FIGURE LEGENDS**

677

678 **Figure 1. Response of *AGL21*-overexpressing and *agl21* mutant plants to NaCl**  
679 **and mannitol in seed germination.** Seed germination assays were carried out as  
680 described in METHODS. Seed germination percentages of the indicated genotypes  
681 grown on MS medium or MS medium containing 150 mM NaCl or 300 mM mannitol  
682 were quantified every day from the 1st day to the 7th day after sowing.  
683 Cotyledon-greening percentages of the eighth day were recorded. Four independent  
684 experiments were conducted, with at least 36 seeds per genotype in each replicate.  
685 Values are mean  $\pm$  SD of four replications.  
686 **(A)** Photographs of seedlings grown on different media at day 8 after the end of  
687 stratification.  
688 **(B-D)** Seed germination rates of indicated genotypes grown on different media.  
689 **(E)** Green cotyledon at day 8 after the end of stratification. Values are mean  $\pm$  SD of  
690 four replications (\* $P < 0.05$ , \*\* $P < 0.01$ ).

691

692 **Figure 2. Response of *AGL21*-overexpressing and *agl21* mutant plants to NaCl**  
693 **and mannitol in seed germination.** Seed germination assays were carried out as  
694 described in METHODS. Seed germination rates of the indicated genotypes grown on  
695 MS medium or MS medium containing 150 mM NaCl or 300 mM mannitol were  
696 quantified every day from the 2nd day to the 8th day after sowing.  
697 Cotyledon-greening percentages of the 8th day were recorded. Four independent  
698 experiments were conducted. At least 42 seeds per genotype were measured in each  
699 replicate. Values are mean  $\pm$  SD of four replications.  
700 **(A)** Photographs of seedlings grown on different media at day 8 after the end of  
701 stratification.  
702 **(B-D)** Seed germination rates of indicated genotypes grown on different media.  
703 **(E)** Green cotyledon at day 8 after the end of stratification. Values are mean  $\pm$  SD of  
704 four replications (\* $P < 0.05$ , \*\* $P < 0.01$ ).

705

706 **Figure 3. Response of *AGL21* to variety external signals in WT and *abi* mutants.**

707 **(A)** Response of *AGL21* to variety external signals in 2 day germinating seeds of WT.

708 Seeds were stratified at 4°C for 2 days in darkness and then sown on MS medium,

709 MS medium without N (-N) or MS medium containing 100 mM NaCl, 250 mM

710 mannitol, 0.2 μM ABA, 10 μM IAA, 10 μM MeJA, respectively. After 2 days

711 germination, seeds were harvested for qRT-PCR analyses.

712 **(B-C)** Response of *AGL21* to ABA (B) and mannitol (C) treatments in WT and

713 different *abi* mutants. 4-day-old seedlings of different genotypes were transferred to

714 MS solution containing 20 μM ABA or 350 mM mannitol, and harvested at indicated

715 time points for RNA extraction and qRT-PCR analyses. The transcript levels of

716 *AGL21* were normalized to the *UBQ5* expression. Values are mean ± SD of three

717 replications.

718

719 **Figure 4. Expression levels of ABA signal pathway genes in *agl21-1* mutant and**

720 ***AGL21*-overexpressing lines quantified by qRT-PCR.** Values are mean ± SD of

721 three replications (\*P < 0.05, \*\*P < 0.01, \*\*\*P < 0.001). *UBQ5* was used as an internal

722 reference.

723 **(A-D)** Expression levels of *ABI5*, *AtEM6*, *RD29B*, *ABF4* in 2-day-old and 3-day-old

724 *AGL21*-overexpressing and *agl21-1* plants grown on MS medium.

725 **(E-H)** Expression levels of *ABI5*, *AtEM6*, *RD29B*, *ABF4* in 2-day-old and 3-day-old

726 *AGL21*-overexpressing and *agl21-1* plants grown on MS medium containing 0.15 μM

727 ABA.

728 **(I-L)** Expression levels of *ABI1*, *ABI2*, *SnRK2.2*, *SnRK2.3* in 2-day-old and 3-day-old

729 *AGL21*-overexpressing and *agl21-1* plants grown on MS medium.

730 **(M-P)** Expression levels of *ABI1*, *ABI2*, *SnRK2.2*, *SnRK2.3* in 2-day-old and

731 3-day-old *AGL21*-overexpressing and *agl21-1* plants grown on MS medium

732 containing 0.15 μM ABA.

733

734 **Figure 5. *AGL21* has similar expression pattern to *ABI5* and positively regulates**

735 ***ABI5* expression and protein accumulation.**

736 (A) Expression levels of genes involved in ABA-dependent seed germination in WT,  
737 *AGL21*-overexpressing and *agl21-1* germinating seeds. Seeds sown on MS medium  
738 supplemented with 0.2  $\mu$ M ABA for 3 days, and then harvested for RNA extraction  
739 and qRT-PCR analyses. *UBQ5* was used as an internal reference. Values are mean  $\pm$   
740 SD of three replications (\* $P$  < 0.05, \*\* $P$  < 0.01).

741 (B-D) *AGL21*, *ABI5* and *AtEM6* expression patterns in imbibed seeds and germinating  
742 seeds on MS medium or MS medium containing 0.15 $\mu$ M ABA. Seeds were imbibed  
743 in water at 4  $\square$  or sown on medium containing ABA or not after 2 days imbibition at  
744 4  $\square$ , and harvested at indicated time points for RNA extraction and qRT-PCR analyses.  
745 *UBQ5* was used as an internal reference. Values are mean  $\pm$  SD of three replications  
746 (\* $P$  < 0.05, \*\* $P$  < 0.01, \*\*\* $P$  < 0.001).

747 (E-F) Expression of *AGL21* and *ABI5* during seed maturation and imbibition.  
748 Expression data were extracted from the *Arabidopsis* eFP browser. The eFP browser  
749 was set to the Developmental Map and the Seed, with absolute values for gene  
750 expression.

751 (G-H) *ABI5* protein levels in WT, *AGL21*-overexpressing and *agl21-1* germinating  
752 seeds. 3 days germinating seeds sown on MS medium or MS medium containing 0.15  
753  $\mu$ M ABA were used for Western blot analysis with anti-*ABI5* antibody. A nonspecific  
754 coomassie blue-stained band is shown as a loading control. Relative band intensity  
755 was measured using ImageJ software (NIH).

756

### 757 **Figure 6. Genetic relationship between *AGL21* and *ABI5*.**

758 (A) ABA response of WT, *abi5-7*, *AGL21*-overexpressing plants and  
759 *AGL21*-overexpressing plants in the genetic background of *abi5-7* (*abi5-7/AGL21OX*  
760 1-6). Seeds of different genotypes were stratified at 4  $\square$  for 2 days and then sown on  
761 MS medium or MS medium containing 0.8  $\mu$ M ABA for 12 days.

762 (B) Green cotyledon percentage of seeds grown on MS medium or MS medium  
763 containing 0.8  $\mu$ M ABA for 12 days. Values are mean  $\pm$  SD of three replications. At  
764 least 25 seeds per genotype were counted in each replicate (\*\*\* $P$  < 0.001).

765



766 **Figure 7. AGL21 directly regulates ABI5 expression.**

767 (A) Schematic representation of *ABI5* promoter showing putative CArG-box motifs  
768 upstream of the transcription start site. CArG-box motifs are indicated with gray lines,  
769 above/below which the sequence and the sites of the last base of the motif relative to  
770 the start code are shown. PCR-amplified fragments are indicated by black lines under  
771 the CArG-box motifs.

772 (B) ChIP-qPCR assay of AGL21 binding to *ABI5* promoter. The 5-day-old  
773 35S::*AGL21*-HA (OX 29-3) transgenic plants and WT plants were transferred to MS  
774 solution with or without 10  $\mu$ M ABA for 4 h, and then the seedlings were harvested  
775 for ChIP-qPCR assay using anti-HA antibody. Enriched values were normalized with  
776 the level of input DNA. Values are mean  $\pm$  SD of three replications (\* $P$  < 0.05, \*\* $P$  <  
777 0.01).

778 (C) Expression of *AtEM1* and *AtEM6* in WT, *agl21-1*, *abi5-7*, *AGL21*-overexpressing  
779 plants and *AGL21*-overexpressing plants in the genetic background of *abi5-7*  
780 (*abi5-7/AGL21OX 1-6*). Seeds of different genotypes were stratified at 4 °C for 2 days  
781 before sown on MS medium or MS medium containing 0.2  $\mu$ M ABA for 3 days, and  
782 then were harvested for qRT-PCR analyses. *UBQ5* was used as an internal reference.  
783 Values are mean  $\pm$  SD of three replications (\* $P$  < 0.05, \*\* $P$  < 0.01, \*\*\* $P$  < 0.001).

784

785

786

787

788

789

Fig. 1

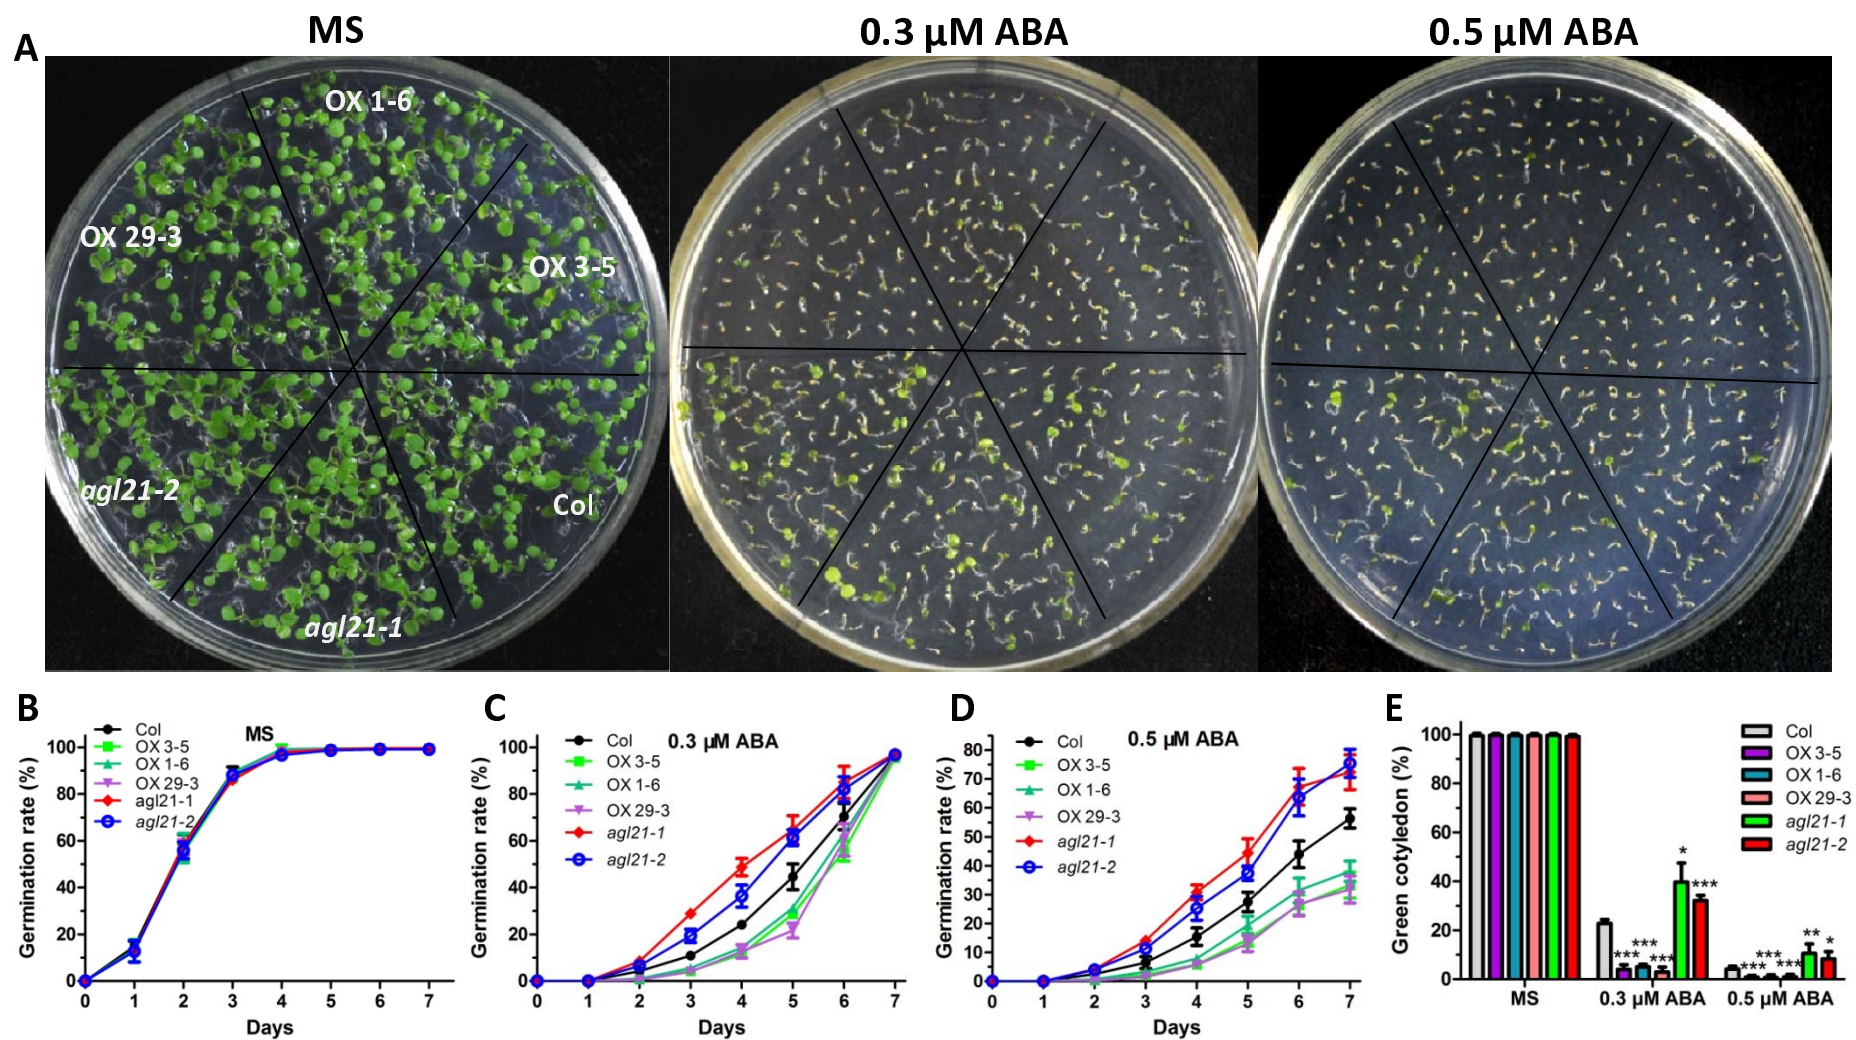

Fig. 2

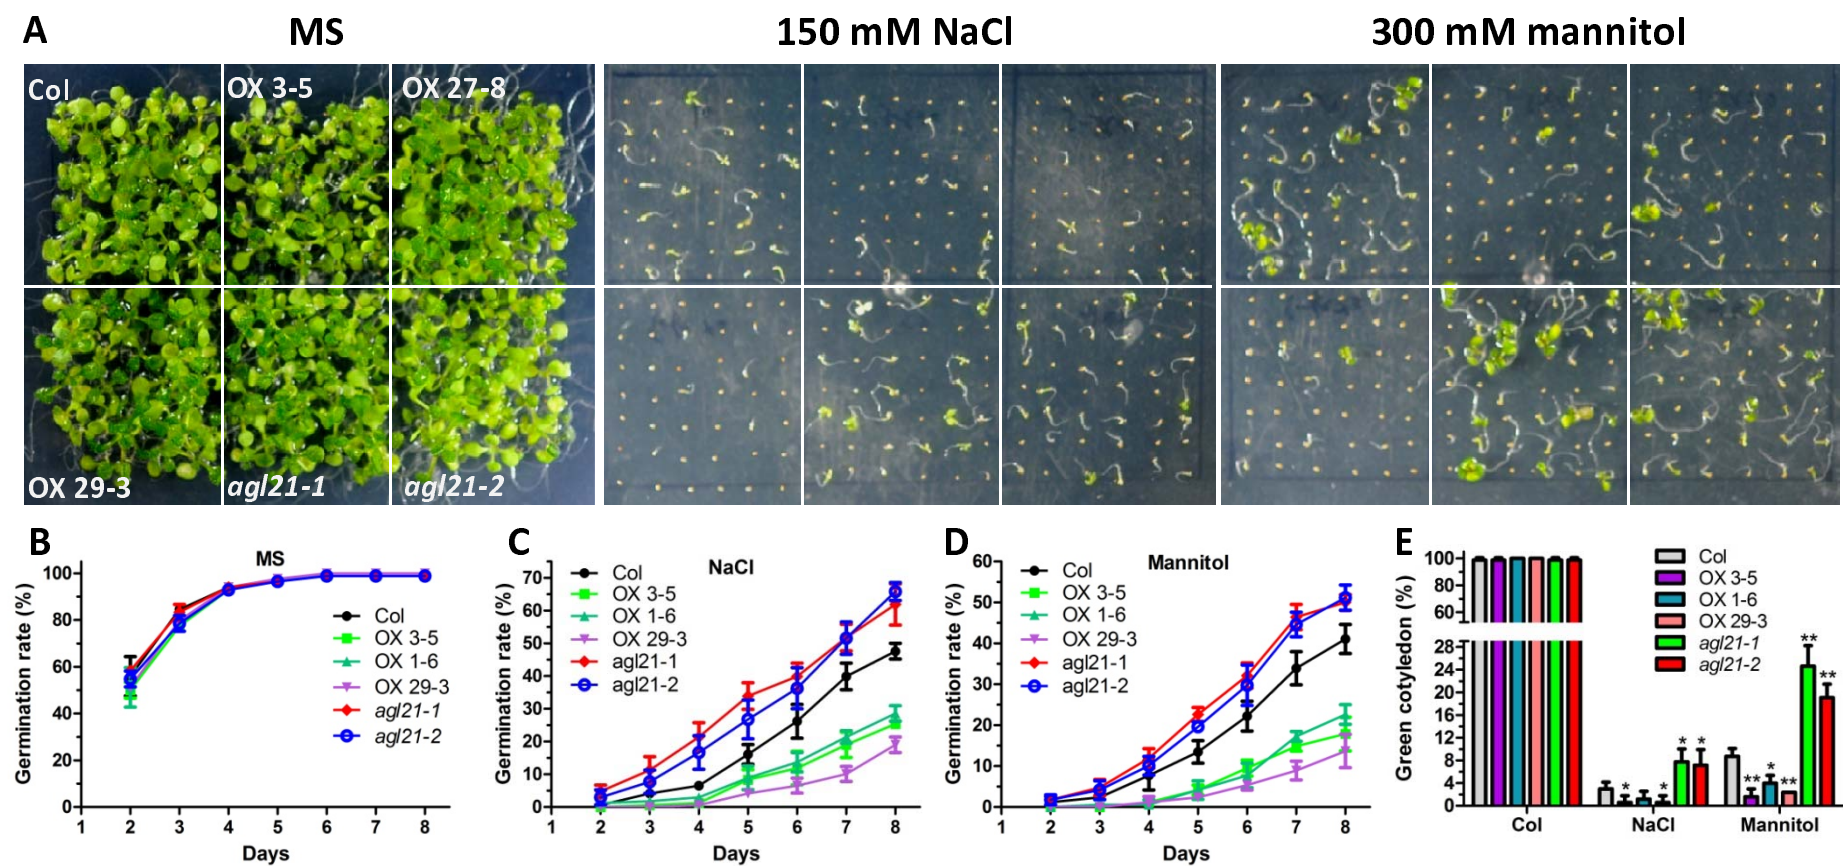

Fig. 3

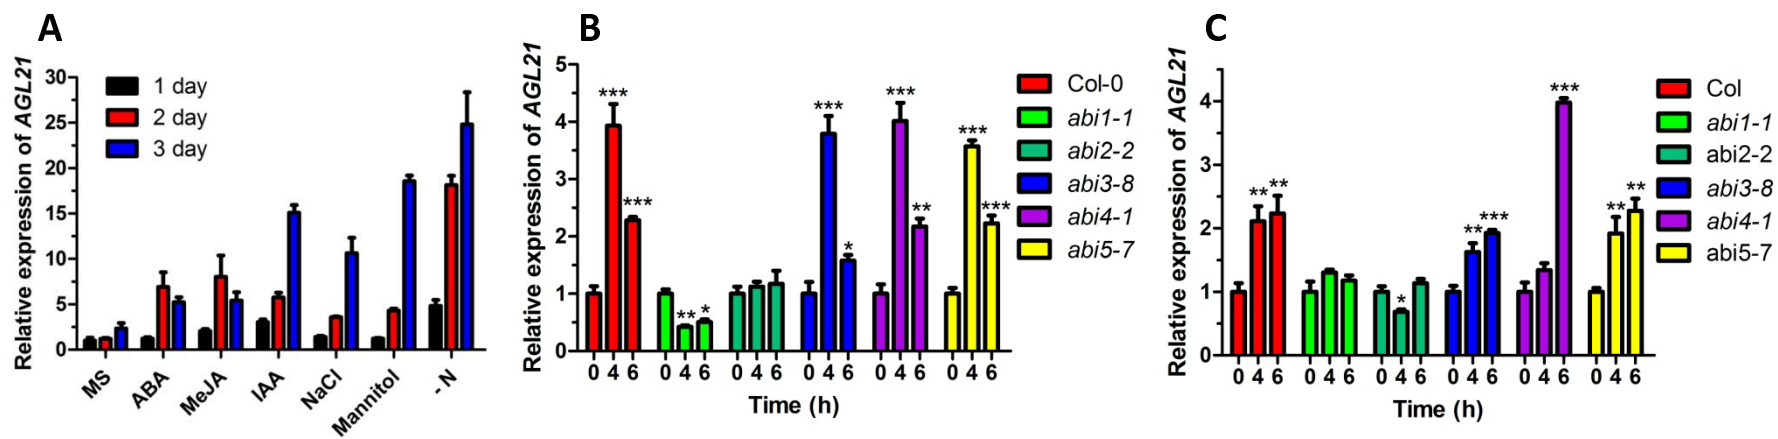

Fig. 4

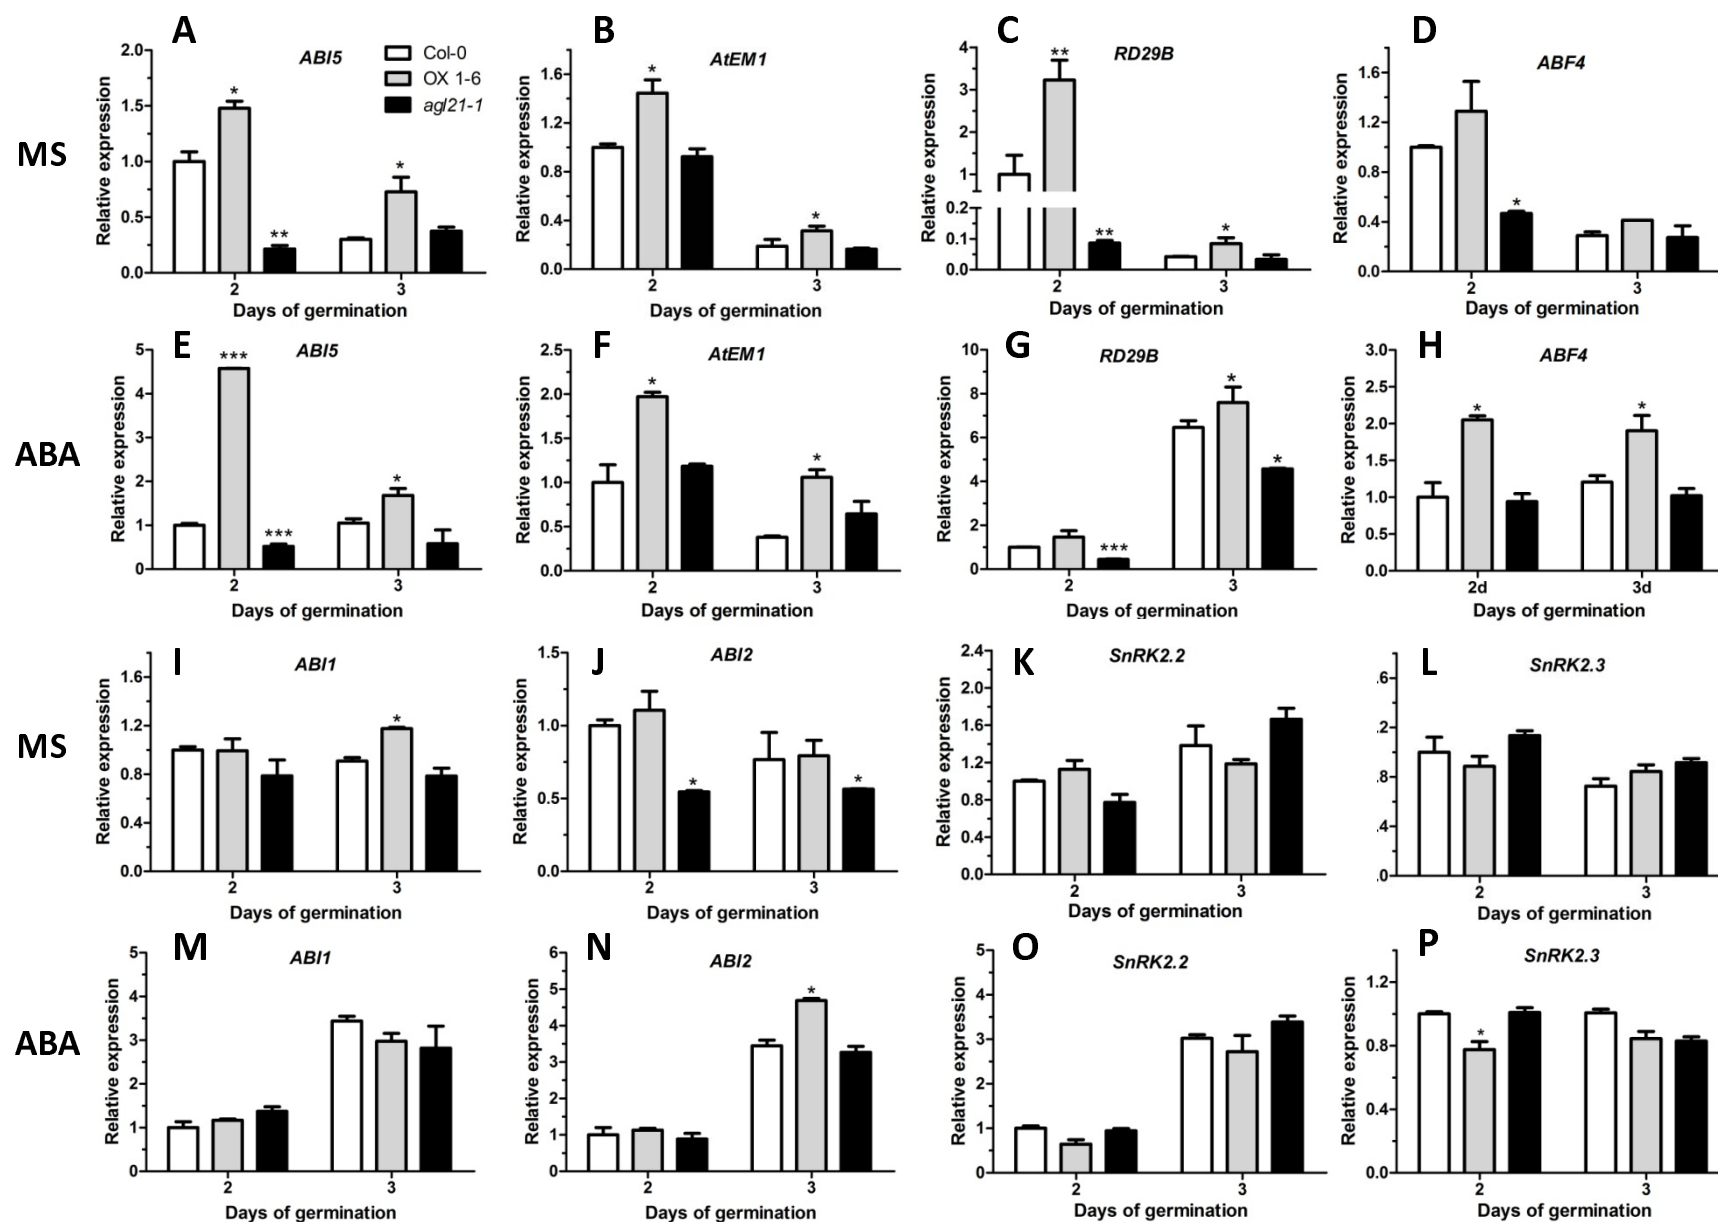

Fig. 5

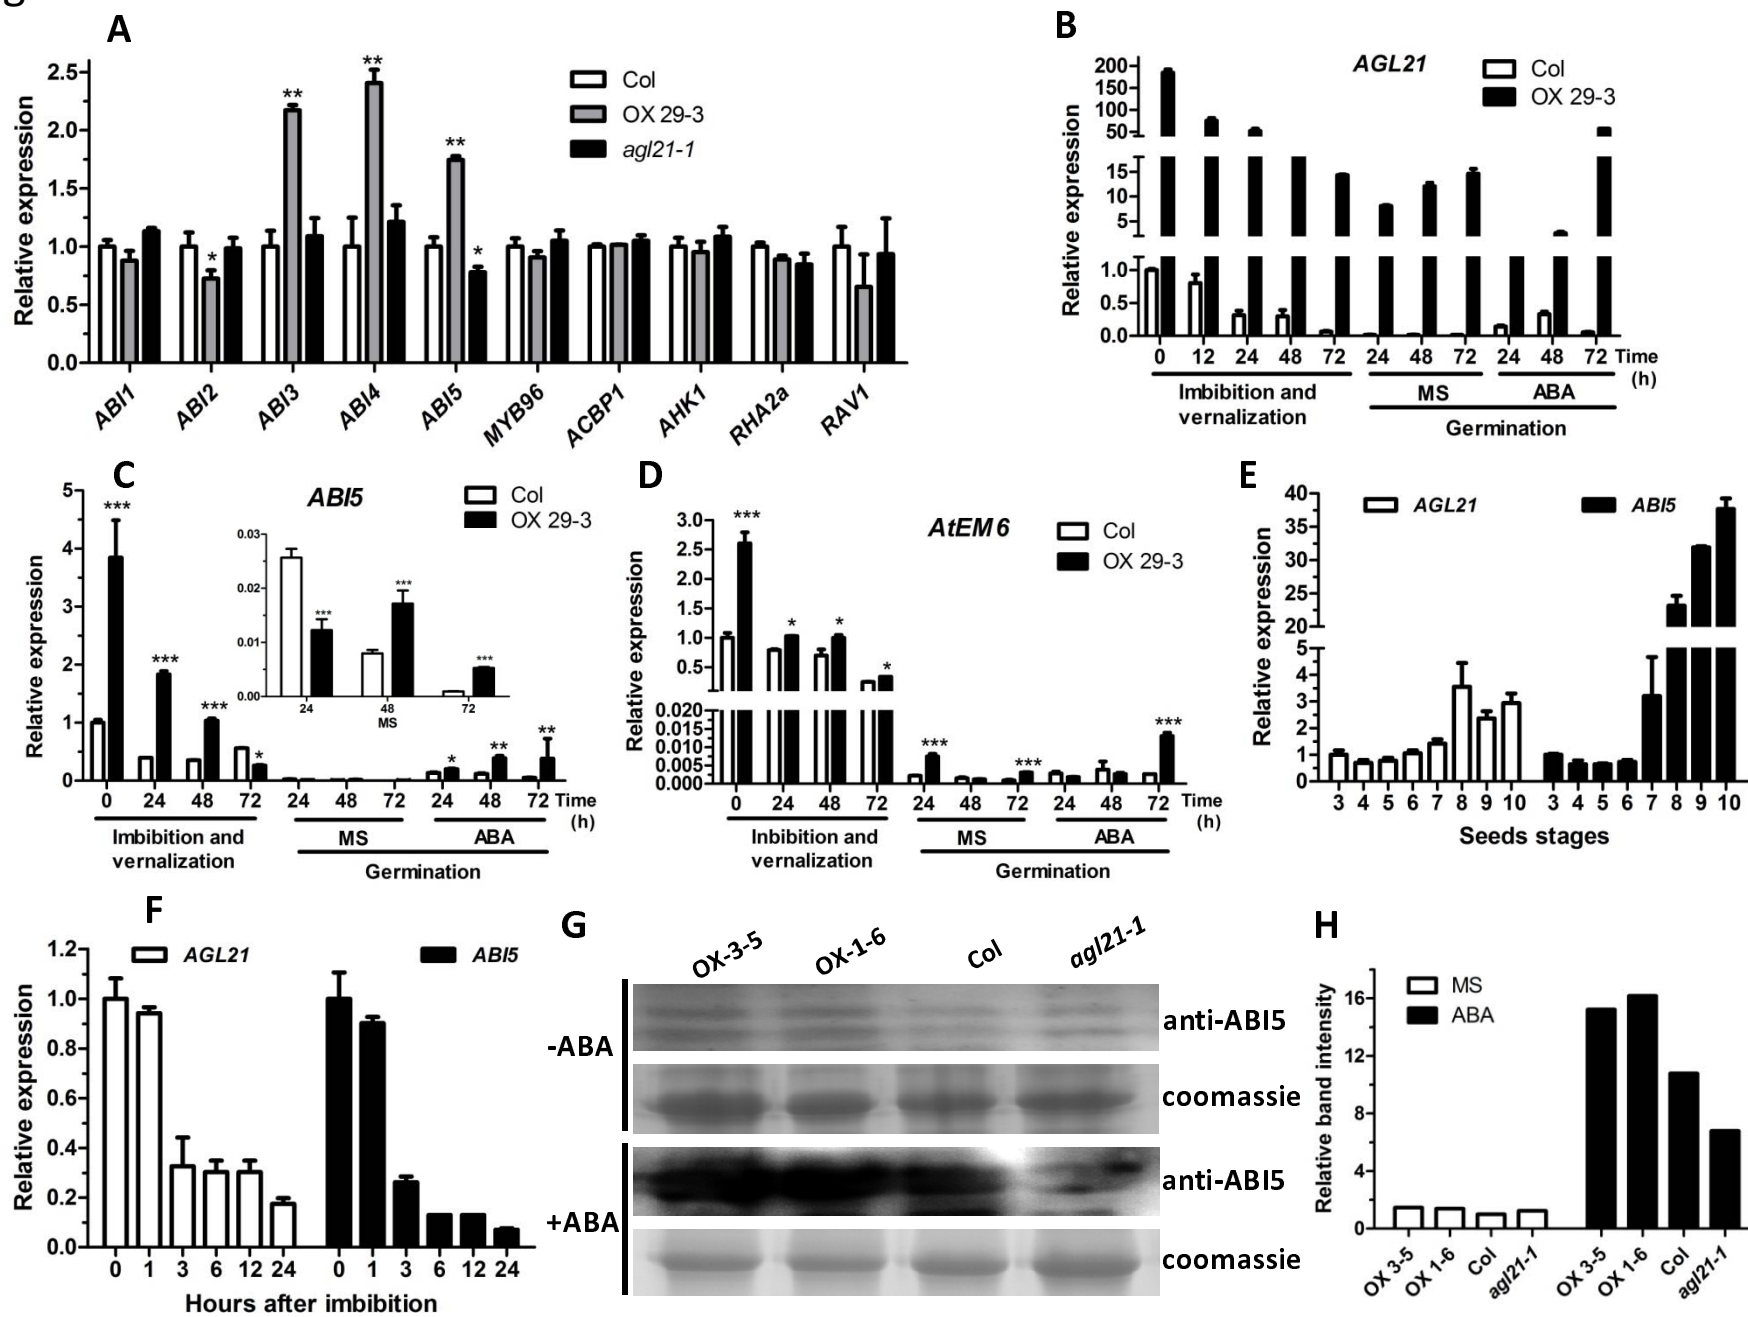

Fig. 6

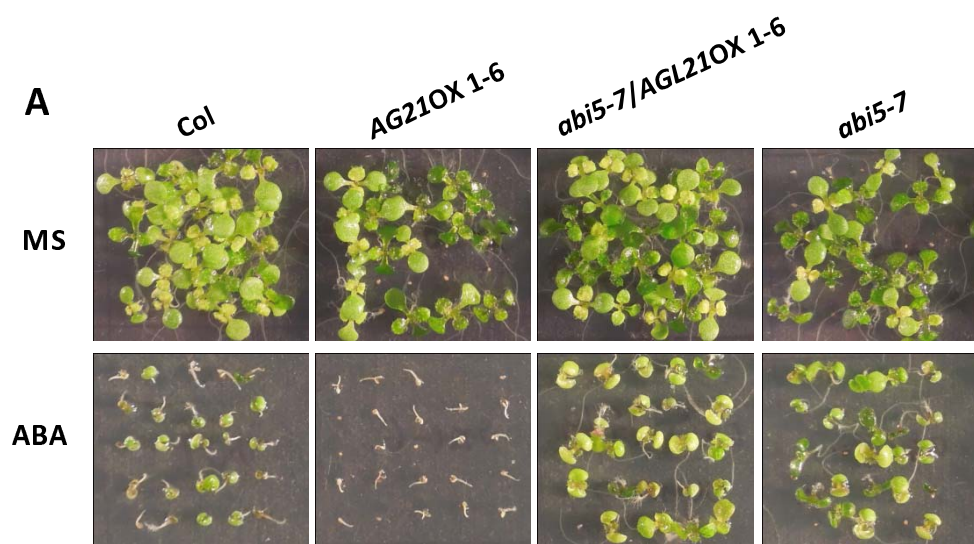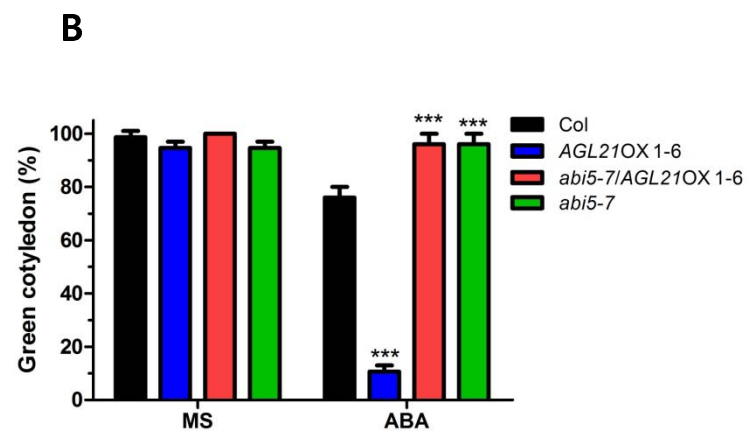

Fig. 7

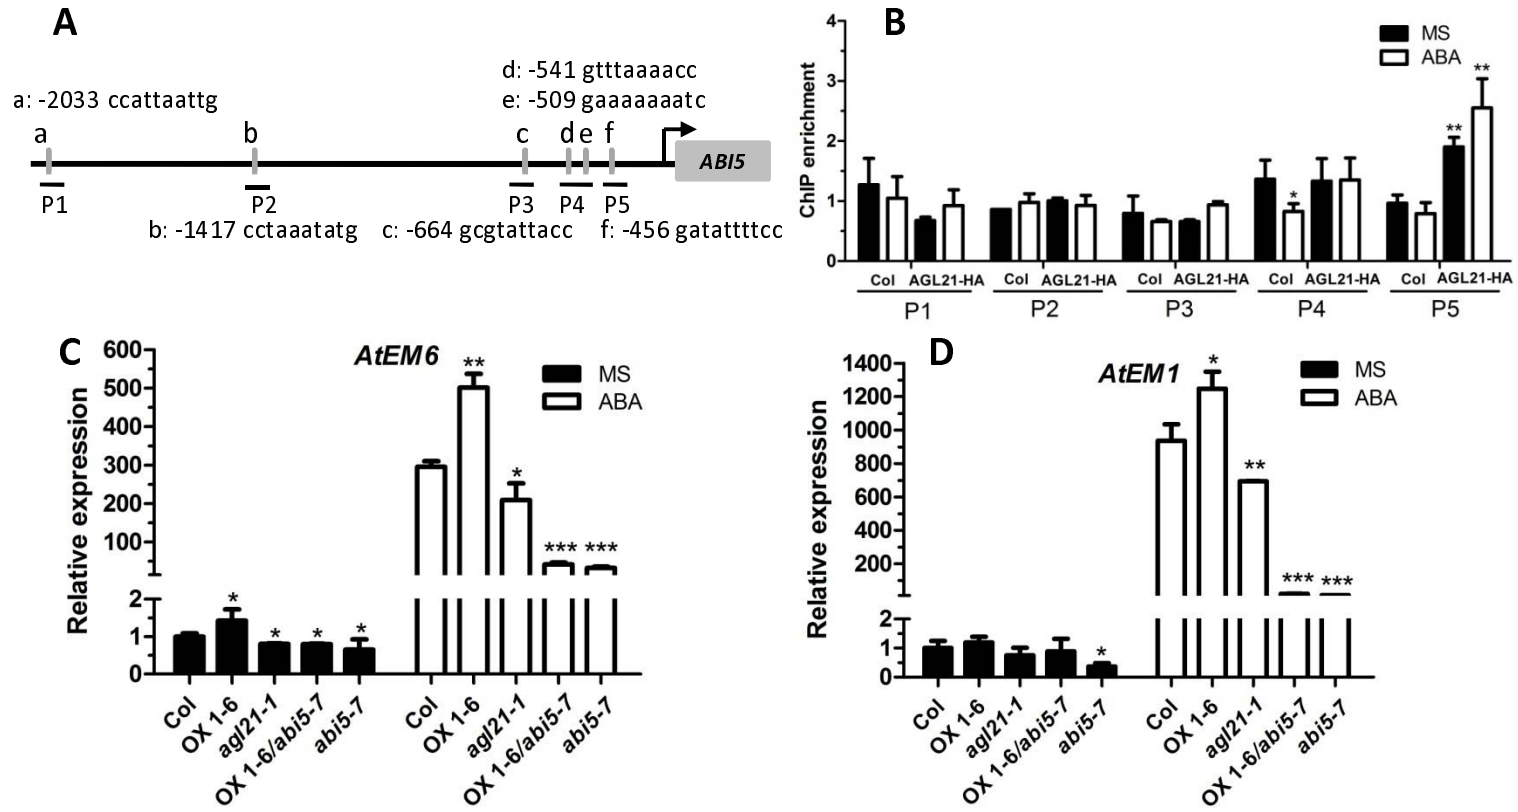

Source: http://biorxiv.org/content/10.1101/082164v1.full.pdf
